# Supplementary figures and images for: Determination of chromium(vi) by anodic stripping voltammetry using a silver-plated glassy carbon electrode
Source: Royal Society of Chemistry journal article supplement (doi:10.1039/c8ay01047a), 2018-01-01

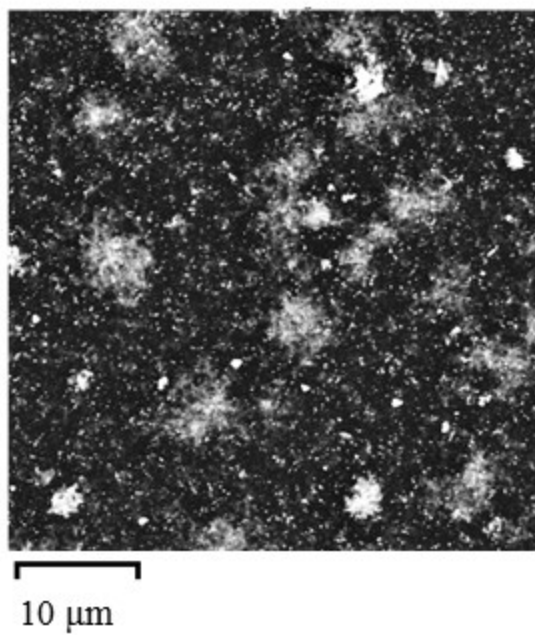

Figure S1.

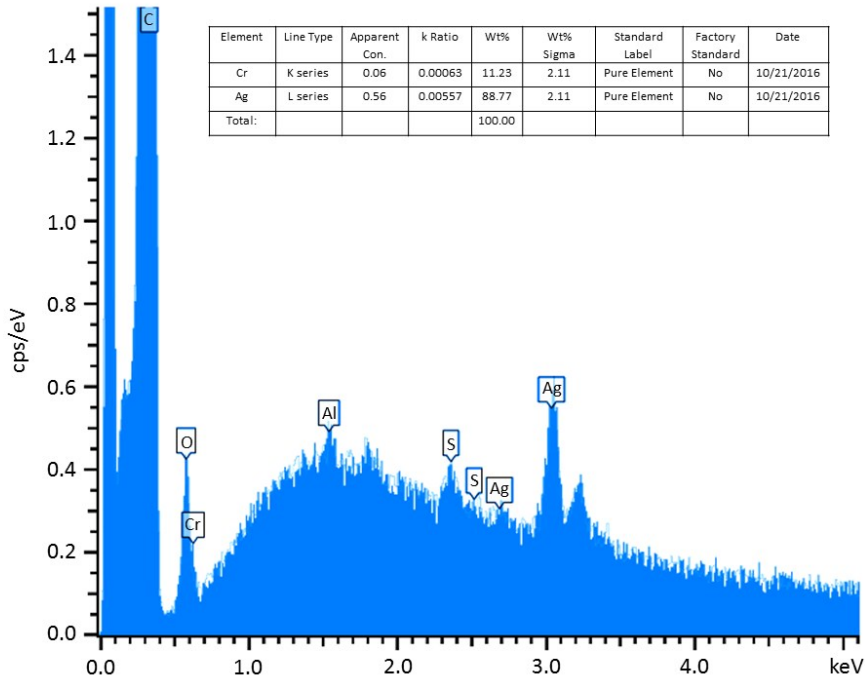

Figure S2.

Supplement: c8ay01047a1.pdf [file c8ay01047a1.pdf]
